# The Clathrin Assembly Protein PICALM Is Required for Erythroid Maturation and Transferrin Internalization in Mice

Mai Suzuki<sup>1</sup>, Hirokazu Tanaka<sup>2</sup>, Akira Tanimura<sup>3</sup>, Kenji Tanabe<sup>4</sup>, Natsuko Oe<sup>4</sup>, Shinya Rai<sup>2</sup>, Syunsuke Kon<sup>5</sup>, Manabu Fukumoto<sup>6</sup>, Kohji Takei<sup>4</sup>, Takaya Abe<sup>7</sup>, Itaru Matsumura<sup>2</sup>, Yuzuru Kanakura<sup>3</sup>, Toshio Watanabe<sup>1\*</sup>

**1** Department of Biological Science, Graduate School of Humanities and Sciences, Nara Women's University, Nara, Japan, **2** Division of Hematology, Department of Internal Medicine, Kinki University, Osaka, Japan, **3** Department of Hematology and Oncology, Osaka University Graduate School of Medicine, Osaka, Japan, **4** Department of Neuroscience, Okayama University Graduate School of Medicine, Dentistry, and Pharmaceutical Sciences, Okayama, Japan, **5** Department of Molecular Immunology, Institute of Development, Aging and Cancer, Tohoku University, Sendai, Japan, **6** Department of Pathology, Institute of Development, Aging and Cancer, Tohoku University, Sendai, Japan, **7** Laboratory for Animal Resources and Genetic Engineering, RIKEN Center for Developmental Biology, Kobe, Japan

## Abstract

Phosphatidylinositol binding clathrin assembly protein (PICALM), also known as clathrin assembly lymphoid myeloid leukemia protein (CALM), was originally isolated as part of the fusion gene *CALM/AF10*, which results from the chromosomal translocation t(10;11)(p13;q14). CALM is sufficient to drive clathrin assembly *in vitro* on lipid monolayers and regulates clathrin-coated budding and the size and shape of the vesicles at the plasma membrane. However, the physiological role of CALM has yet to be elucidated. Here, the role of CALM *in vivo* was investigated using *CALM*-deficient mice. *CALM*-deficient mice exhibited retarded growth *in utero* and were dwarfed throughout their shortened life-spans. Moreover, *CALM*-deficient mice suffered from severe anemia, and the maturation and iron content in erythroid precursors were severely impaired. *CALM*-deficient erythroid cells and embryonic fibroblasts exhibited impaired clathrin-mediated endocytosis of transferrin. These results indicate that CALM is required for erythroid maturation and transferrin internalization in mice.

**Citation:** Suzuki M, Tanaka H, Tanimura A, Tanabe K, Oe N, et al. (2012) The Clathrin Assembly Protein PICALM Is Required for Erythroid Maturation and Transferrin Internalization in Mice. PLoS ONE 7(2): e31854. doi:10.1371/journal.pone.0031854

**Editor:** Tsutomu Kume, Feinberg Cardiovascular Research Institute, Northwestern University, United States of America

**Received:** August 1, 2011; **Accepted:** January 17, 2012; **Published:** February 21, 2012

**Copyright:** © 2012 Suzuki et al. This is an open-access article distributed under the terms of the Creative Commons Attribution License, which permits unrestricted use, distribution, and reproduction in any medium, provided the original author and source are credited.

**Funding:** This work was supported by research grants from the Ministry of Education, Science, Sports, Culture and Technology, Japan; Kurokawa Cancer Research Foundation; The Japan Health Foundation; The Naito Foundation; Sasaki Scientific Research Grant from The Japan Science Society; and Nara Women's University Intramural Grant for Project Research. The funders had no role in study design, data collection and analysis, decision to publish, or preparation of the manuscript.

**Competing Interests:** The authors have declared that no competing interests exist.

\* E-mail: toshiwatana@cc.nara-wu.ac.jp

## Introduction

Clathrin-coated vesicles mediate endocytosis of plasma membrane receptors, channels, and transporters, as well as transmembrane proteins and various soluble macromolecules. As the main component of clathrin-coated pits and vesicles, clathrin forms structures termed triskelia, each composed of three heavy and three light chains [1–5], which in turn assemble into a lattice-like structure on the surface of coated pits. The major proteins that drive coated pit formation are the adaptor protein complex AP-2 [1,6,7] and clathrin assembly proteins such as phosphatidylinositol-binding clathrin assembly protein (PICALM), also known as clathrin assembly lymphoid myeloid leukemia protein (CALM). The neuronal homolog of CALM, AP180, has been shown to be sufficient for clathrin lattice assembly on lipid monolayers and for the regulation of clathrin-coated buds and the size and shape of vesicles at the plasma membrane [8–11].

CALM possesses an AP180 N-terminal homology (ANTH) domain that binds to membrane lipids [9,12–15] and specific motifs that bind to clathrin and AP-2, which are the primary components of clathrin-coated vesicles [11,14,15]. Cellular

depletion of CALM by RNA interference results in the formation of clathrin-coated structures of abnormal size and shape, which suggests that CALM regulates the proper formation of clathrin-coated vesicles [11].

CALM was originally isolated as a fusion gene, *CALM/AF10*, which results from the chromosomal translocation t(10;11)(p13;q14). This translocation is a cytogenetic abnormality found in acute lymphoblastic leukemia, acute myeloid leukemia and in malignant lymphomas [16]. In a murine bone marrow transplantation model, expression of *CALM/AF10* in primary murine bone marrow cells results in the development of an aggressive form of leukemia [17,18]. These data suggest that CALM may play an important role in the growth and differentiation of hematopoietic cells. This notion is supported by reports that *fit1* mutants, which contain nonsense point mutations in the *CALM* gene, are anemic, display numerous peripheral blood defects, and are deficient in early hematopoietic progenitor cell populations [19–23]. Detailed analysis of the hematopoietic defects of *fit1* mutants has yet to be reported, and so the physiological role of CALM remains elusive.

Using a genetic approach to elucidate the function of CALM in mammals, we established *CALM*-deficient mice through gene

targeting. *CALM*-deficient mice were growth retarded *in utero* and remained dwarfed throughout their shortened life-span. In addition, *CALM*-deficient mice suffered from severe anemia due to ineffective erythropoiesis in the bone marrow. These phenotypes resembled those of *fit1* mutants. Moreover, the maturation and iron content of erythroid precursors were severely impaired in *CALM*-deficient mice. In addition, erythroid cells and murine embryonic fibroblasts (MEFs) isolated from *CALM*-deficient mice exhibited impaired clathrin-mediated internalization of transferrin. These data collectively demonstrate that *CALM* is required for erythroid maturation and transferrin internalization in mice.

## Materials and Methods

### Ethics Statement

This study received specific approval from the Committee of Animal Experiments, Nara Women's University (approval ID 06-13).

### Generation of *CALM*-deficient mice

A genomic clone encompassing the exon that contained the initiation codon (methionine) of *CALM* was isolated from a C57BL/6 BAC library (BACPAC) using Red/ET methods. A targeting vector was constructed in which the marker gene PGK-neo-pA was inserted into this exon. A DT-A fragment was ligated to the 5' end of the targeting vector for negative selection. The targeting vector was linearized by *Sal* I digestion and introduced into TT2 embryonic stem (ES) cells by electroporation [24]. Of 96 G418-resistant clones, 22 were positive for homologous recombination, as determined by PCR (<http://www.cdb.riken.jp/arg/Methods.html>), eight clones had undergone homologous recombination as determined by Southern blot analysis. Three clones were injected into 8-cell stage embryos. Chimeras were mated with C57BL/6J females and germline transmission of the disrupted *CALM* allele was confirmed. Heterozygous F1 mice were intercrossed to produce homozygous *CALM*-deficient mice (Acc. No. CDB0683K: <http://www.cdb.riken.jp/arg/mutant%20mice%20list.html>). Genotyping was carried out using PCR and specific primers designed to amplify either the mutant or wild-type allele. The sequences of the primers used for PCR analysis were as follows: primer A: 5'-ATGTCTGGCCAGAGCCTGACG-GACCGAATC-3' and calm typing C: 5'-GGGTCTGGGAGAG-GATGCGGGGGTCTTCAC-3' for the wild-type allele; and Neogt-1: 5'-CTGACCGCTTCCTCGTGCTTTACG-3' and calm typing C for the knockout allele.

### Antibodies

For analysis by fluorescence-activated cell sorting (FACS), the following antibodies were purchased from BD Pharmingen: anti-c-Kit (2B8), -Sca-1 (D7), -TER119 (specific for erythroid lineage cells), -Mac-1 (M1/70), -Gr-1 (RB6-8C5), -CD11c (HL3), -B220 (RA3-6B2), -CD44 (IM7), and -CD3e (145-2C11). For immunohistochemistry, an anti-transferrin receptor antibody was purchased from Zymed. Alexa488-conjugated anti-mouse IgG was obtained from Invitrogen. For immunoblot analysis, an anti- $\beta$ -actin antibody was purchased from Sigma, the anti-*CALM* polyclonal antibody (G-17) was purchased from Santa Cruz, and the horseradish peroxidase (HRP)-conjugated anti-mouse IgG and anti-goat IgG antibodies were purchased from Thermo Fisher Scientific.

### Immunoblot Analysis

Immunoblot analysis was performed as described previously [25]. Briefly, cells were lysed in SDS-PAGE sample buffer,

separated by SDS-PAGE, and then transferred to a nitrocellulose membrane. The membranes were incubated in blocking buffer (140 mM NaCl, 1 mM EDTA, and 20 mM Tris-HCl, pH 7.4) containing 5% bovine serum albumin and 0.02% Tween 20, followed by incubation for 1 h at room temperature with primary antibody. Membranes were incubated with the appropriate secondary antibodies diluted in blocking buffer, and then immunoreactive proteins were visualized by enhanced chemiluminescence (GE Healthcare).

### Flow cytometry

Flow cytometry were performed using a BD FACS Canto II system (BD Biosciences). The data were analyzed using BD FACSDiva software (BD Biosciences) or FlowJo software (TreeStar, Ashland, OR).

### Purification of murine Lin<sup>-</sup> Sca-1<sup>+</sup> c-Kit<sup>+</sup> (LSK) cells

Murine fetal liver (FL) cells were harvested from embryonic day 14.5 (E14.5) embryos and mononuclear cells (MNCs) were obtained by density gradient centrifugation. MNCs were incubated with a cocktail of anti-lineage antibodies (Abs): biotinylated anti-CD3e (145-2C11), -CD45R/B220 (RA3-6B2), -Gr-1 (RB6-8C5), and -TER-119 (TER-119) Abs; fluorescein isothiocyanate (FITC)-conjugated anti-Sca-1 (D7); allophycocyanin (APC)-conjugated anti-c-Kit (2B8); and streptavidin-PE-cy7 (BD Biosciences). LSK cells were obtained by FACS using FACS Aria (BD Biosciences). Staining with 7-amino-actinomycin D (Calbiochem) was used to eliminate non-viable cells.

### Hematopoietic stem cell (HSC) transplantation

LSK cells ( $1 \times 10^6$ ) obtained from the fetal livers of *CALM*-deficient and wild-type E14.5 embryos (CD45.2) were transferred into irradiated (1,300 rad) recipients along with  $1 \times 10^5$  wild-type LSK cells (CD45.1). The relative contributions from the transferred HSCs were analyzed 9 weeks after transplantation.

### Analysis of intracellular labile iron pool (LIP)

Cellular LIP was measured using the fluorescent metalosensor calcein-AM (CA-AM; Invitrogen), as previously reported, with some modifications [26,27]. Briefly, cells were incubated for 1 h with or without 500  $\mu$ M deferoxamine (DFO) (Sigma) in serum-free media ( $\alpha$ -MEM). Following washing with phosphate-buffered saline (PBS), cells were incubated with 250 nM CA-AM for 10 min at 37°C in PBS, washed twice, and then resuspended at a density of  $1 \times 10^6$ /mL in PBS containing 1% bovine serum albumin at room temperature. In addition to CA-AM, as indicated, cells were also incubated with APC-conjugated anti-TER119 and PE-conjugated anti-CD71 Abs. Fluorescence intensity was measured using FACS Canto II (BD Biosciences) in continuous mode. LIP was calculated as the difference in CA mean fluorescence intensity between DFO-treated and -untreated cells.

### Image analysis

Microscopic images of May-Grunwald-Giemsa-stained peripheral smears were obtained using an Olympus (BX51) microscope equipped with a digital camera (Olympus DP71) and processed with DP Controller software.

### *CALM*-deficient embryonic fibroblastoid cell lines

Primary MEFs were generated from mated wild-type or *CALM*-deficient mice 14.5 days after conception. Primary MEFs were immortalized by transfection with a plasmid containing SV40 genomic DNA. Briefly, primary MEFs were plated in six-well

plates and transfected with 1  $\mu$ g of total DNA using Lipofectamine 2000 Reagent (Invitrogen, CA), according to the manufacturer's instructions. Stable immortalized cell clones were obtained by serial dilution. The expression of CALM protein was assessed by immunoblot. MEFs were cultured in Dulbecco's modified Eagle's medium (DMEM) supplemented with 10% fetal calf serum (FCS) and antibiotics (penicillin/streptomycin) at 37°C and 5% CO<sub>2</sub>.

### Internalization assay

To evaluate the uptake of transferrin by erythroblasts, single cell suspensions from fetal liver or bone marrow were incubated in serum-free medium at 37°C for 2 h.

Cells were labeled with 50  $\mu$ g/ml Alexa Fluor 647-conjugated human transferrin (Invitrogen) in binding buffer (RPMI1640 containing 20 mM HEPES pH 7.4, 1% BSA) on ice for 30 min. After washing to remove unbound transferrin, internalization of transferrin was induced by incubating the cells in buffer (RPMI1640 containing 10% fetal bovine serum) at 37°C for various times. Any transferrin that remained bound to the plasma membrane was removed by incubating the cells in pre-chilled acidic buffer (20 mM MES pH 5, 130 mM NaCl, 50  $\mu$ M deferoxamine, 2 mM CaCl<sub>2</sub> and 0.1% BSA) on ice for 20 min. After washing three times, cells were labeled with FITC-conjugated anti-TER119 Ab and the fluorescence intensity of internalized transferrin in the erythroblast cell population (TER119-high cells) was quantified by FACS Canto II (BD Biosciences).

To detect the internalization of transferrin in MEFs, cells on coverslips were incubated with 10  $\mu$ g/ml Alexa Fluor 488-conjugated human transferrin (Invitrogen) for 20 min at 37°C, and then fixed with 3.7% formaldehyde in PBS for 15 min at room temperature. After washing with PBS, cover slips were mounted on glass slides using Prolong Gold (Invitrogen) and then analyzed by spinning disc confocal microscopy (CSU10; Yokogawa Electric Co.) using an inverted microscope (IX-71; Olympus) equipped with an Ar/Kr laser, as described previously [25]. To quantitate the internalization of transferrin in MEFs, the fluorescence intensity of randomly selected individual cells (total cell area) was measured and processed using Image J software (<http://rsbweb.nih.gov/ij/index.html>).

## Results

### Generation of CALM-deficient mice

To address the functional role of CALM in mice, CALM-deficient mice were generated using a gene targeting approach. The CALM-targeting construct was designed with an expression cassette containing the neomycin-resistance gene (*neo<sup>r</sup>*) inserted just after the initiation ATG codon in exon 1 of the CALM gene (Fig. 1A). Eight clonal ES cell lines bearing the targeted allele were identified by Southern blot analysis, of which three were used to generate chimeric mice with germ line transmission of the targeted CALM allele. Their offspring were used for all studies reported herein. Heterozygous mice exhibited no obvious abnormalities. To generate homozygous CALM-deficient mice, F1 heterozygous mice were interbred and the F2 offspring were genotyped by PCR and Southern blot (Fig. 1B and C). The absence of CALM protein expression in CALM-deficient mice was confirmed by immunoblot (Fig. 1D).

### CALM-deficient mice exhibit significant growth defects and a shortened life-span

CALM-deficient mice were obtained at the expected Mendelian ratios (Table 1). The CALM-deficient mice were smaller in size compared to their wild-type littermates (Fig. 2A), and more than

90% died between birth and weaning (Table 1). To characterize the retarded growth phenotype of CALM-deficient mice in more detail, the body weight of CALM-deficient mice and their wild-type littermates was assessed. As shown in Figure 2B, CALM-deficient mice weighed, on average, 35.3% (for males) and 39.7% (for females) of the weight of normal littermates at weaning (28 days of age). Because CALM-deficient mice exhibited a growth retardation phenotype at birth, we also assessed whether CALM was necessary for normal prenatal growth. The weight of CALM-deficient embryos was compared to that of their wild-type littermates at E14.5. CALM-deficient embryos were approximately 74% of the size of normal littermates (data not shown), which suggested that CALM is also required for normal prenatal growth. The phenotype of CALM-deficient mice therefore was retarded growth *in utero* with mice remaining dwarfed throughout their life-span.

It should be noted that after back-crossing five times with C57B6/J mice, no CALM-deficient mice were obtained, which suggested that CALM deficiency may result in a lethal phenotype that is dependent on the genetic background of B6 and CBA mice.

### CALM-deficient mice suffer from severe anemia

Many of the tissues in CALM-deficient mice, including liver, kidney and tibia, were smaller compared to wild-type mice (Fig. 2C, E). By marked contrast, however, the spleens of CALM-deficient mice were larger than those of their wild-type littermates, which was indicative of splenomegaly (Fig. 2D). Histologic examination revealed that follicles were absent in the spleens of CALM-deficient mice, which indicating a defect in the B cell population. This was confirmed by FACS analysis, which was consistent with impaired B cell maturation in the spleens of CALM-deficient mice (data not shown). In addition, there were fewer bone marrow cells in CALM-deficient mice and the isolated cell pellets were pale in appearance (Fig. 2F), which suggested a defect in the regulation of hematopoiesis. In fact, the number of TER119-positive erythroid cells in the bone marrow of CALM-deficient mice was significantly reduced compared to control littermates (Fig. 2G). We also observed a ballooning and granular degeneration of hepatocytes (data not shown), indicative of hepatocyte damage. As shown in Table 2, the number of red blood cells (RBCs) in CALM-deficient mice was significantly reduced compared to control littermates, and the mice were severely anemic, with dramatically lower hemoglobin levels. Additionally, peripheral blood in CALM-deficient mice contained hypochromic RBCs (Fig. 2H).

### Maturation of erythroid cells is impaired in CALM-deficient mice

To investigate whether the severe anemia in CALM-deficient mice was due to defects in erythroid differentiation, the expression of transferrin receptor 1 (CD71) and TER119 was analyzed by FACS, which allows the different stages of maturation of murine erythroblasts to be distinguished [28]. Bone marrow cells were immunostained with FITC-conjugated anti-TER119 and PE-conjugated CD71 Abs (Fig. 3A, C). A representative FACS histogram is shown in Figure 3A. Region I of the histogram (CD71<sup>high</sup>TER119<sup>low</sup>) represents the proerythroblast population or immature erythroblasts. Region II (CD71<sup>high</sup>TER119<sup>high</sup>) represents the basophilic erythroblast population. Region III (CD71<sup>low-med</sup>TER119<sup>high</sup>) represents the polychromatic and orthochromatic erythroblast populations, which are hemoglobin-producing cells, and region IV (CD71<sup>low</sup>TER119<sup>high</sup>) represents mature erythrocytes. This profile is known as Socolovsky's plot. As shown in Figure 3A and C, CALM-deficient mice had significantly fewer cells in region II compared with their wild-type littermates. These results

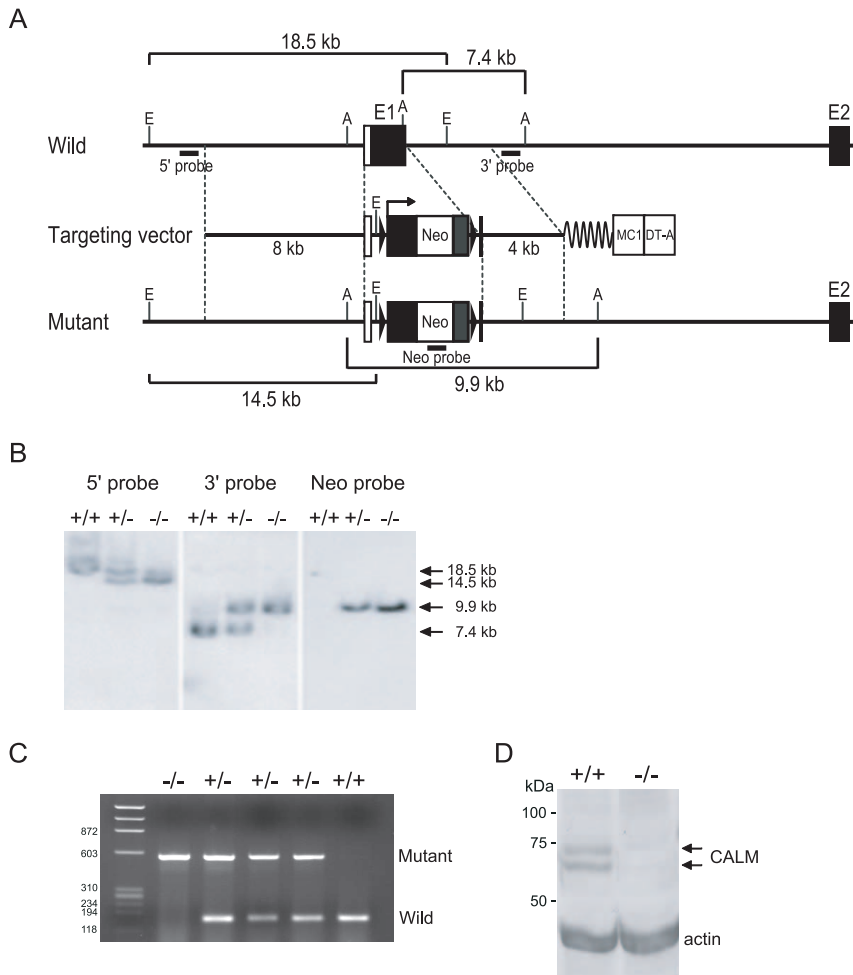

**Figure 1. Targeted disruption of the *CALM* gene.** (A) Schematic of the targeting strategy used for disruption of the first coding exon of *CALM*. (B) Southern hybridization analysis of DNA isolated from targeted mouse embryos. From left to right: 5' probe, 3' probe and neo probe, as shown in A. (C) Genomic PCR analysis of DNA isolated from mouse tail. The genotypes are indicated above each lane. (D) Immunoblot analysis of stable MEF cell lines from wild-type (+/+) and *CALM*-deficient (-/-) mouse embryos (E14.5). The expected molecular weights of *CALM* are 62 and 72 kDa (arrows). Actin was used as a loading control. doi:10.1371/journal.pone.0031854.g001

suggested that erythroid maturation at the stage of proerythroblast to immature erythroblast is impaired in *CALM*-deficient mice.

To confirm these results, we also analyzed the expression levels of CD44 and TER119, the relative levels of which have been shown to correlate with different maturation stages of murine erythroblasts [29]. Bone marrow cells were subjected to immuno-

staining with FITC-conjugated anti-TER119 and APC-conjugated CD44 Abs (Fig. 3 B, D). As shown in Figure 3B and D, *CALM*-deficient mice had significantly lower numbers of cells in region III compared with their wild-type littermates, which supported the idea that erythroid maturation from proerythroblast to immature erythroblast is impaired in *CALM*-deficient mice.

These data collectively suggested that the maturation of erythroid cells is severely impaired in *CALM*-deficient mice.

**The erythroid defects in *CALM*-deficient mice are cell autonomous**

HSC activity was analyzed by transplantation assay. Fetal liver cells from wild-type or *CALM*-deficient embryos (CD45.2) were transplanted into X-ray irradiated host mice along with a one-tenth fraction of wild-type cells (CD45.1) as a competitor. After 9 weeks, CD45.2-positive hematopoietic cells derived from *CALM*-deficient embryos had repopulated the bone marrow at the same rate as wild-type cells (Fig. 4A). However, after 12 weeks, impaired maturation of early to late stage erythroblasts and abnormal erythroid cells were observed only in host mice transplanted with fetal liver cells from *CALM*-deficient embryos (Fig. 4B and C). The

**Table 1. Genotypes of intercrossed *CALM*<sup>+/-</sup> mice.**

| Stage | +/+     | +/- | -/-     |
|-------|---------|-----|---------|
| P28   | 72 (69) | 138 | 8 (69)  |
| P0    | 23 (25) | 50  | 8 (25)  |
| E19.5 | 9 (9)   | 17  | 6 (9)   |
| E18.5 | 16 (13) | 26  | 12 (13) |
| E14.5 | 17 (15) | 29  | 18 (15) |

The total number of embryos or postnatal mice isolated for each genotype is indicated, with values in parentheses indicating the number of embryos or postnatal mice expected based on Mendelian distribution.

doi:10.1371/journal.pone.0031854.t001

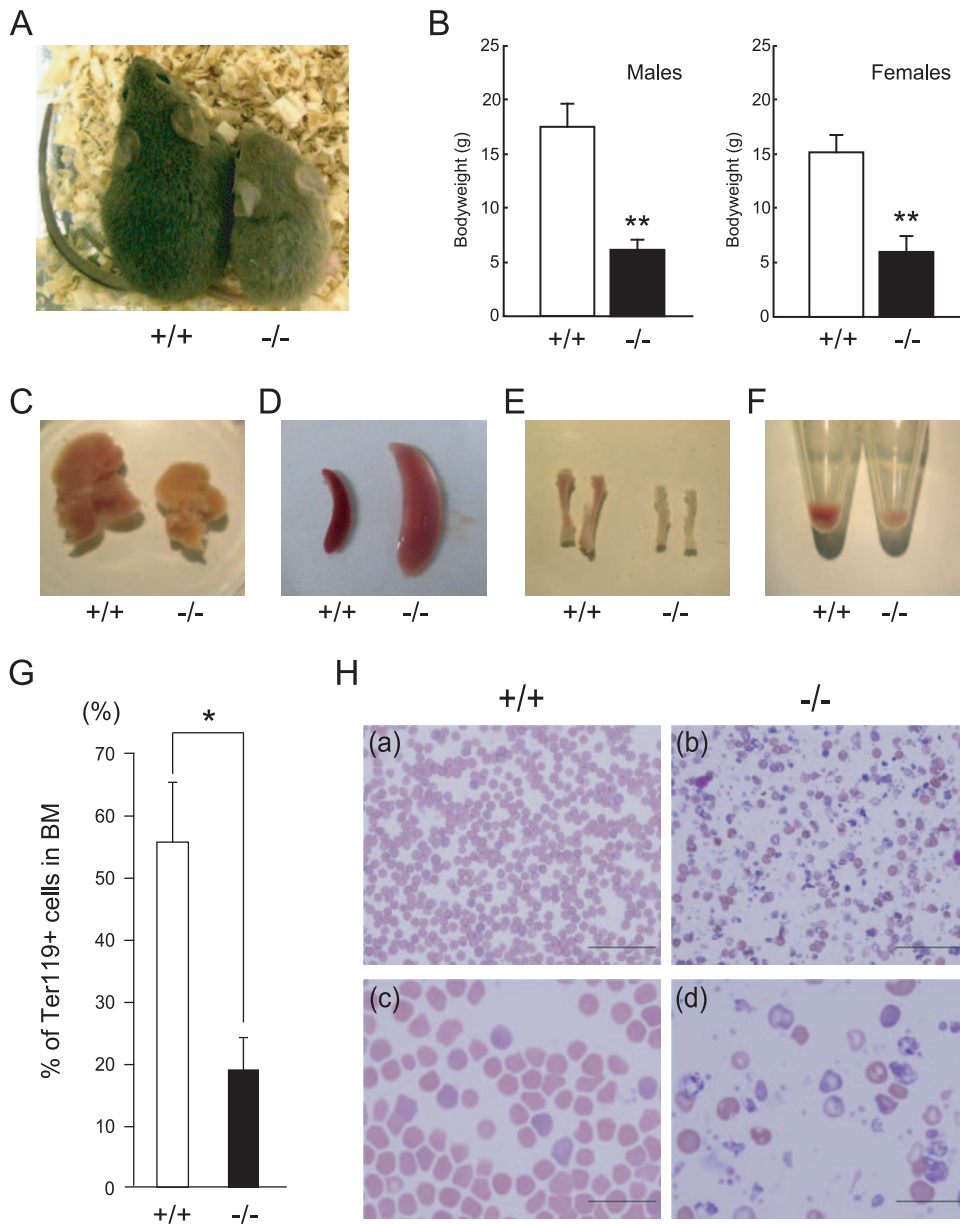

**Figure 2. Growth retardation and peripheral blood morphology in postnatal *CALM*-deficient mice.** (A) Wild-type (+/+) (left) and *CALM*-deficient (-/-) (right) mice at 3 weeks of age. (B) Average weight of wild-type (+/+) and *CALM*-deficient (-/-) mice at postnatal day 28. Data shown represent *CALM*-deficient males (n = 3), *CALM*-deficient females (n = 4), wild-type males (n = 36), and wild-type females (n = 35). \*\*,  $P < 0.01$  vs control. Liver (C), spleen (D) and tibia (E) from wild-type (+/+) or *CALM*-deficient (-/-) mice at 3 weeks of age. (F) Bone marrow cells were collected by centrifugation. Note that the pellet from *CALM*-deficient (-/-) mice is small and pale in color. (G) Quantification of TER119-positive bone marrow cells (data represent means  $\pm$  SD; n = 5). \*,  $P < 0.05$  vs. control. (H) Peripheral blood smears from wild-type (+/+) littermates (left panels, a and c) or *CALM*-deficient (-/-) mice (right panels, b and d) at 3 weeks of age. Magnification: upper panels, 400 $\times$ ; lower panels, 1000 $\times$ . Scale bar, 50  $\mu$ m (upper panel) and 20  $\mu$ m (lower panel). doi:10.1371/journal.pone.0031854.g002

impaired maturation of erythroid cells was confirmed by anti-CD44 staining (data not shown).

In addition, host mice transplanted with fetal liver cells from *CALM*-deficient embryos were anemic and had fewer RBCs and lower hemoglobin levels than wild-type transplanted mice (data not shown). These results indicated that the observed erythroid defects in *CALM*-deficient mice were cell autonomous and not a result of the hematopoietic environment.

It should be noted that host mice transplanted with fetal liver cells from *CALM*-deficient embryos also exhibited splenomegaly,

and that there was a similar pattern of progenitor activity in spleen cells as in bone marrow (data not shown). On the other hand, no progenitor activity was detected in spleen cells from host mice transplanted with fetal liver cells from wild-type embryos.

#### Incorporation of iron is reduced in erythroid cells of *CALM*-deficient mice

Erythroid cells from *CALM*-deficient mice were severely anemic and erythroid maturation was impaired (Fig. 2, 3 and 4). Since iron deficiency is known to inhibit erythroid differentiation and

**Table 2.** Hematopoietic parameters of control and *CALM*<sup>-/-</sup> mice.

| Genotype | WBC      | RBC        | Hb        | HCT       | MCV       | MCH       | MCHC      | PLT         |
|----------|----------|------------|-----------|-----------|-----------|-----------|-----------|-------------|
| +/+      | 3.7±0.98 | 875.3±65.5 | 13.2±0.85 | 47.4±3.29 | 54.1±0.44 | 15.0±0.18 | 27.8±0.17 | 80.0±54.45  |
| +/-      | 2.3±0.49 | 840.0±52.4 | 12.6±0.88 | 46.5±2.42 | 55.4±2.13 | 15.0±0.97 | 27.1±0.74 | 103.0±29.90 |
| -/-      | 3.4±0.90 | 267.8±97.0 | 3.7±1.29  | 14.2±4.71 | 53.4±4.80 | 13.9±1.17 | 26.1±1.01 | 118.6±23.34 |

Data were obtained from 3-week-old mice. WBC, white blood cell count ( $\times 10^3/\mu\text{l}$ ); RBC, red blood cell ( $\times 10^4/\mu\text{l}$ ); Hb, hemoglobin (g/dl); HCT, hematocrit (%); MCV, mean corpuscular volume (fl); MCH, mean corpuscular hemoglobin (pg); MCHC, mean corpuscular hemoglobin concentration (g/dl); Plt, platelet count ( $\times 10^4/\mu\text{l}$ ). Data are the mean  $\pm$  SD of four wild-type, four *CALM*<sup>+/-</sup>, and five *CALM*<sup>-/-</sup> mice. Statistical analysis was carried out using the unpaired t-test. \*\* $P < 0.01$ , \* $P < 0.05$ . doi:10.1371/journal.pone.0031854.t002

induce anemia [30,31], we investigated whether an iron-deficiency in erythroid cells in *CALM*-deficient mice was the cause of the anemia.

Iron bound to transferrin is taken up by cells via transferrin receptor 1-mediated endocytosis. This is the main pathway of iron intake in erythroid cells. We first analyzed amount of ferritin and transferrin in the plasma of wild-type and *CALM*-deficient mice by ELISA (ICL, Portland, OR, USA). There were no differences in the levels of transferrin in wild-type and *CALM*-deficient mice, whereas ferritin levels, which directly correlate with the total amount of iron stored in the body, were three-times higher in *CALM*-deficient mice than wild-type mice. These results suggested that there was an excess of iron in the body of *CALM*-deficient mice, despite the hypochromic and microcytic anemic phenotype. This suggested that there was an imbalance in the distribution of iron from erythroid cells to other tissues in *CALM*-deficient mice. To investigate this possibility, we examined the labile (or chelatable) iron pool (LIP) in erythroid cells, which is a point of convergence of the iron metabolic pathways. The LIP was measured using the cell permeable iron chelator CA-AM, as previously described [26,27]. Upon uptake by viable cells, CA-AM undergoes hydrolysis by esterases to form calcein (CA), the fluorescence of which can be measured (excitation wavelength of 488 nm, emission wavelength of 517 nm). CA fluorescence is quenched upon binding to the cellular LIP in a stoichiometric fashion. The presence of a high-affinity chelator such as desferoxamine (DFO) results in extraction of iron from CA-iron complexes and a corresponding increase in CA fluorescence. Thus, the difference in cellular fluorescence in the presence and absence of DFO can be taken as a measure of the LIP. The LIP is dependent on cell type and maturation stage; analysis of erythroid cells in the blood, bone marrow and in culture has shown that the LIP decreases during maturation [26,27]. Compared to wild-type cells, erythroid cells in the bone marrow of *CALM*-deficient mice exhibited higher CA fluorescence intensity in regions I through III of the Socolovsky plot (Fig. 5A, B). As shown in Fig. 5C and D, the mean fluorescence intensity (MFI) of CA-AM-loaded wild-type fetal liver erythroid cells at stages I and II was 762 and 126, respectively, and MFI was significantly increased to 1211 and 263, respectively, by treatment with DFO. Based on the difference in MFI in DFO-treated and -untreated cells, the LIP in wild-type cells in stages I and II was  $484 \pm 181$  and  $137 \pm 17$  (MFI  $\pm$  S.D.;  $n = 7$ ), respectively (Fig. 5E). On the other hand, in *CALM*-deficient cells, there was only a small increase in CA fluorescence in the presence of DFO, which suggested that the cellular LIP in *CALM*-deficient cells was smaller than in wild-type cells. The LIP also appeared to be relatively constant in *CALM*-deficient cells ( $55 \pm 76$  and  $39 \pm 26$  at stages I and II, respectively;  $n = 3$ ). Similar results were obtained using bone marrow cells from host mice transplanted with fetal liver cells from wild-type or *CALM*-deficient embryos (data not shown).

Several reports show that CA is pumped out of cells via the multidrug resistance machinery [32]. There were no apparent differences in mean CA-fluorescence intensity in DFO-treated wild-type and *CALM*-deficient cells, which indicated that there were similar levels of CA in both cell types (Fig. 5 D). Thus, it is unlikely that the differences in LIP were due to the multidrug resistance machinery. Taken together, these results indicated that the iron content of erythroid cells at stages I and II is lower in *CALM*-deficient mice compared to their wild-type littermates. Therefore, altered distribution of iron in *CALM*-deficient mice inhibits erythroid maturation and results in anemia.

#### Reduced incorporation of transferrin into erythroid cells and MEFs derived from *CALM*-deficient mice

Transferrin receptor 1, also known as CD71, is highly expressed in erythroblasts, and uptake of iron-bound transferrin through transferrin receptor 1 is the main pathway of iron uptake in erythroid precursors [33,34]. It is also well established that inhibition of this process inhibits erythroid maturation. Because transferrin is internalized via clathrin-dependent endocytosis [6,35], and *CALM* localizes to clathrin-coated pits, clathrin-mediated endocytosis of transferrin in *CALM*-deficient mice was assessed [11,15].

Transferrin uptake by erythroid cells from fetal liver was assessed by FACS, as described in Materials and Methods. The level of transferrin receptor (CD71) expression in TER119-positive erythroid cells from *CALM*-deficient mice was about 2.5-fold higher than that seen in wild-type cells ( $3365 \pm 1398$  and  $8554 \pm 1681$  MFI  $\pm$  S.D, respectively;  $n = 3$ ), which could reflect differences in the internalization of transferrin receptors. Thus, transferrin uptake was normalized to transferrin receptor level for this analysis. In wild-type cells, 62% of bound transferrin was rapidly internalized after 3 min. On the other hand, only 19% of bound transferrin was internalized by *CALM*-deficient cells (Fig. 6A). Similar results were obtained using wild-type and *CALM*-deficient erythroid cells derived from neonatal bone marrow (data not shown).

To examine this defect in transferrin internalization in more detail, MEFs were established from wild-type and *CALM*-deficient E14.5 embryos. Wild-type MEFs expressed the transferrin receptor and transferrin was internalized in a constitutive manner (Fig. 6B). However, *CALM* knock-out MEFs derived from *CALM*-deficient embryos failed to incorporate transferrin (Fig. 6B), despite similar overall levels of transferrin receptor (Fig. 6C). Transferrin uptake in wild-type and *CALM*-deficient MEFs was quantitated and the results are shown in Fig. 6D. Uptake of transferrin by wild-type MEFs was approximately twice that seen in *CALM*-deficient cells. These results indicated that the internalization of transferrin receptors is abrogated in *CALM*-deficient cells. Thus, the erythropoietic defects in *CALM*-deficient mice may be due to inhibition of transferrin endocytosis in the absence of *CALM*.

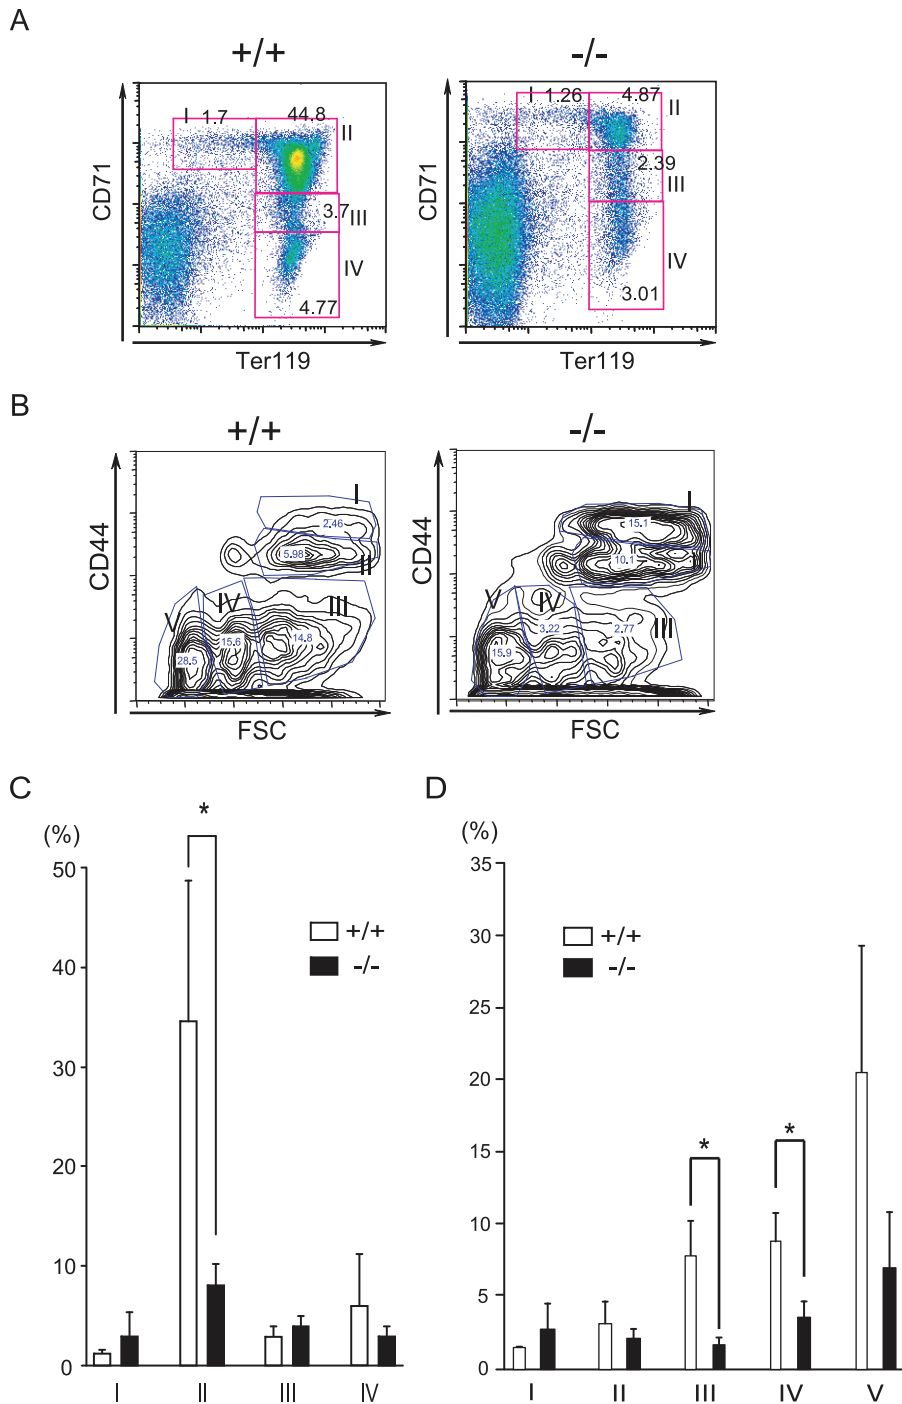

**Figure 3. FACS analyses of erythroblasts at different stages of maturation in wild-type or *CALM*-deficient mice.** (A) Representative flow cytometry histograms. In 3-week-old mice, erythroblasts at different maturation stages were identified by double staining with FITC-conjugated anti-TER119 and PE-conjugated anti-CD71 Abs. (B) Representative flow cytometry histograms. Erythroblasts at different maturation stages were identified by double staining with FITC-conjugated anti-TER119 and APC-conjugated anti-CD44 Abs. Plots of CD44 vs. forward scatter (FSC) for TER119-positive cells are shown. (C) Quantification of regions I to IV of (A) (data represent means  $\pm$  SD; n = 4). \*,  $P < 0.05$  vs. control. (D) Quantification of regions I to V of (B) (data represent means  $\pm$  SD; n = 5). \*,  $P < 0.05$  vs. control. doi:10.1371/journal.pone.0031854.g003

## Discussion

In this report, we established *CALM*-deficient mice and showed that these mice exhibit retarded growth *in utero* and remain dwarfed throughout their shortened life-span. *CALM*-deficient

mice suffer from severe anemia, similar to what has been reported for *fit1* mutant mice [21]. In addition, the maturation of erythroid precursors was severely impaired in mice lacking *CALM*. The iron content of erythroid precursors was lower in *CALM*-deficient mice compared to their wild-type littermates. Importantly, those

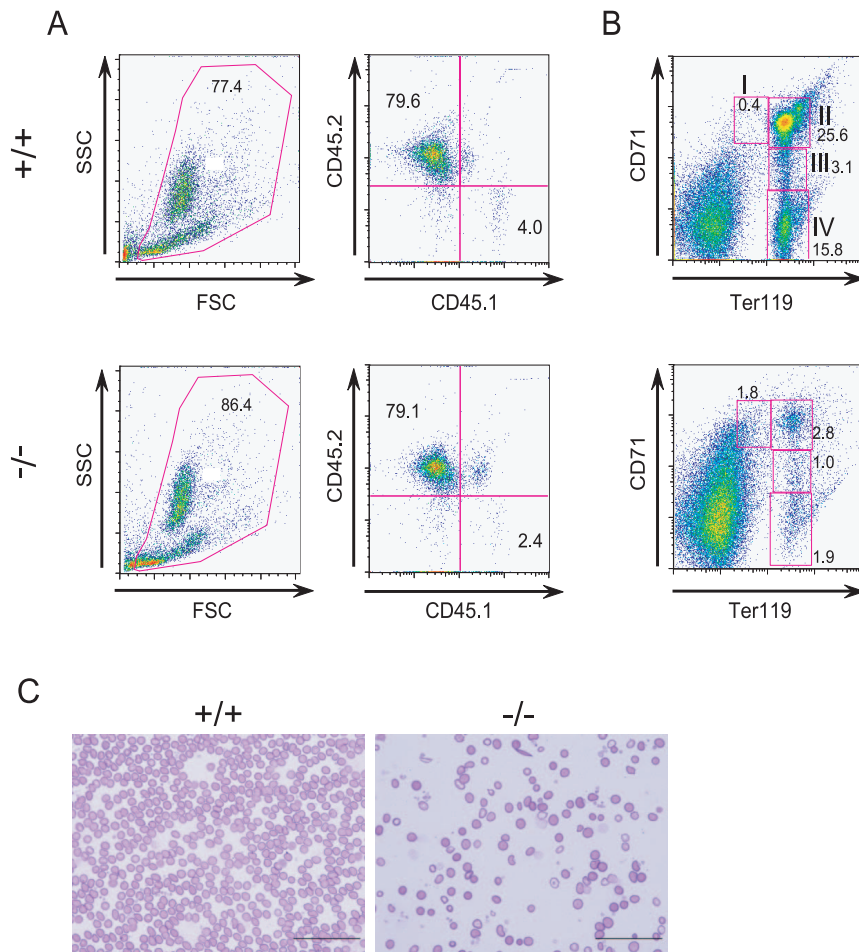

**Figure 4. *CALM* is required for normal erythropoiesis.** (A) CD45 profile of peripheral blood cells from transplanted mice 9 weeks after transplantation. (B) FACS analyses of erythroblasts at different maturation stages from transplanted mice using anti-TER119 and anti-CD71 Abs. (C) Peripheral blood smears from mice transplanted with fetal liver cells from either wild-type littermates or *CALM*-deficient embryos. Scale bar, 50  $\mu$ m. In A, B, and C, (+/+) and (-/-) represent host mice transplanted with cells from wild-type and *CALM*-deficient mice, respectively. doi:10.1371/journal.pone.0031854.g004

phenotypes were reconstituted in transplantation experiments. The amount of ferritin in *CALM*-deficient mice was three-times higher than that in wild-type mice, suggesting that there is an excess of iron in the plasma of mice deficient in *CALM*.

It is well established that iron deficiency inhibits erythroid maturation [26,27,33,34]. Anemia is the most obvious manifestation of iron deficiency due to the large amount of iron required for hemoglobin production in developing erythroid cells. *Transferrin receptor 1*-deficient mice die during embryogenesis due to the lack of transferrin-mediated iron uptake [31]. *Slc11a2* is the only transmembrane transporter protein known to be required for iron entry into cells and is required for normal hemoglobin production during the development of erythroid precursors. *Slc11a2*-deficient mice also exhibit severe anemia after birth [30]. Our results suggest that iron deficiency in *CALM*-deficient mice results in inhibition of erythroid maturation and subsequent anemia.

The question then arises as to which molecule involved in iron uptake is affected by *CALM*-deficiency in mice. Transferrin receptor 1 (TFR1), also known as CD71, is one such candidate molecule. TFR1 is highly expressed in erythroblasts, and the uptake of iron-bound transferrin through TFR1 is the main pathway by which iron enters erythroid precursors [33,34]. It is also well established that inhibition of this process prevents

erythroid maturation due to iron deficiency [31]. Transferrin is taken up by cells through clathrin-dependent endocytosis [6,35]; thus, it is likely that impaired transferrin endocytosis in *CALM*-deficient mice underlies the inhibition of erythroid maturation. However, the involvement of *CALM* in clathrin-dependent endocytosis of transferrin remains controversial. While one study has shown that over-expression of full-length *CALM* and *CALM* fragments that contain clathrin-binding domains can block transferrin endocytosis [15], another study reports that over-expression of *CALM* had no effect on transferrin endocytosis [36]. *CALM* depletion experiments using small inhibitory (si)RNA did not demonstrate an effect on transferrin endocytosis, although there was partial inhibition of epidermal growth factor (EGF) receptor endocytosis [36,37]. Based on these reports, *CALM* is not believed to be an essential component of clathrin-associated endocytosis of transferrin [11,36,37]. The *CALM*-deficient mice generated in the current study provided an excellent model system for probing the role of *CALM* in clathrin-dependent endocytosis of transferrin. Transferrin uptake by erythroid cells was analyzed by FACS, and the results suggested that transferrin uptake is significantly attenuated in *CALM*-deficient erythroid cells. We also established *CALM* knock-out (KO) MEFs from *CALM*-deficient embryos and clearly demonstrated that *CALM* KO MEFs fail to



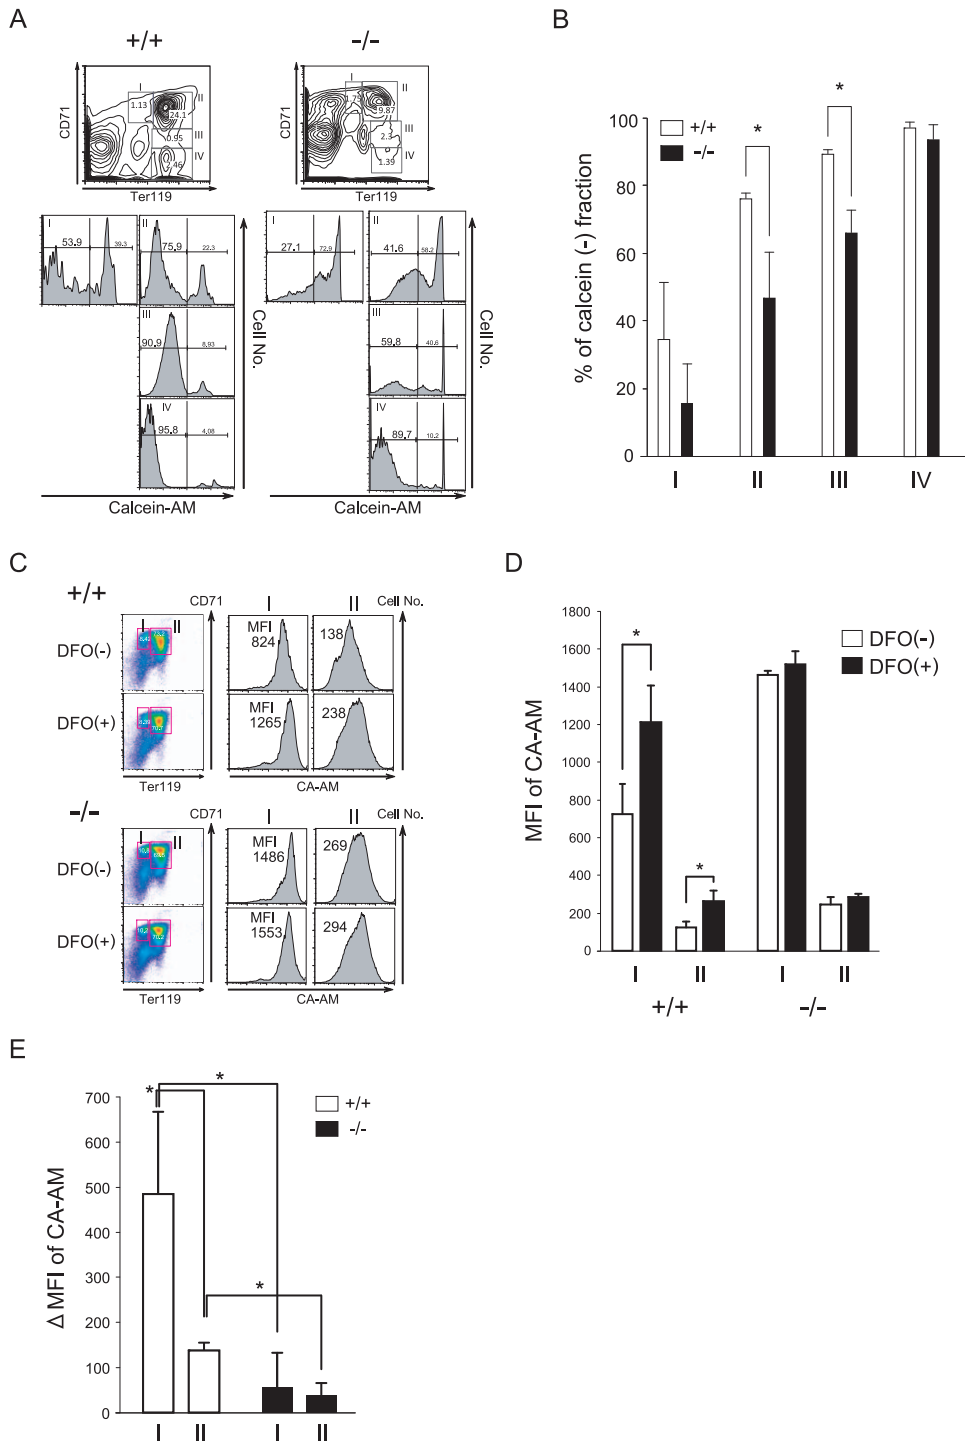

**Figure 5. Flow cytometry analysis of the LIP.** (A) Representative flow cytometry histograms. Erythroblasts at different stages of maturation were identified by double staining with APC-conjugated anti-TER119 and PE-conjugated anti-CD71 Abs (upper). These cells were simultaneously loaded with calcein (CA-AM) for the LIP assay (lower). (B) Quantification of CA-negative fractions in regions I to IV of (A) (data represent means  $\pm$  SD; n = 3). (C) Representative flow cytometry histograms of E14.5 fetal liver cells. Erythroblasts at different stages of maturation were identified by double staining with APC-conjugated anti-TER119 and PE-conjugated anti-CD71 Abs. Cells were treated for 1 h with the iron chelator DFO, loaded with CA-AM for 10 min, and then analyzed. (D) Representative fluorescence (FL1-high) histograms of CA-stained cells treated with or without DFO are shown, along with mean fluorescence intensity (MFI). (E) The LIP is represented by the difference in MFI between DFO-treated and -untreated cells (data represent means  $\pm$  SD; n = 3). \*,  $P < 0.05$  vs. control. In A, B, C and D, (+/+) and (-/-) represent wild-type and *CALM*-deficient mice, respectively. doi:10.1371/journal.pone.0031854.g005

A

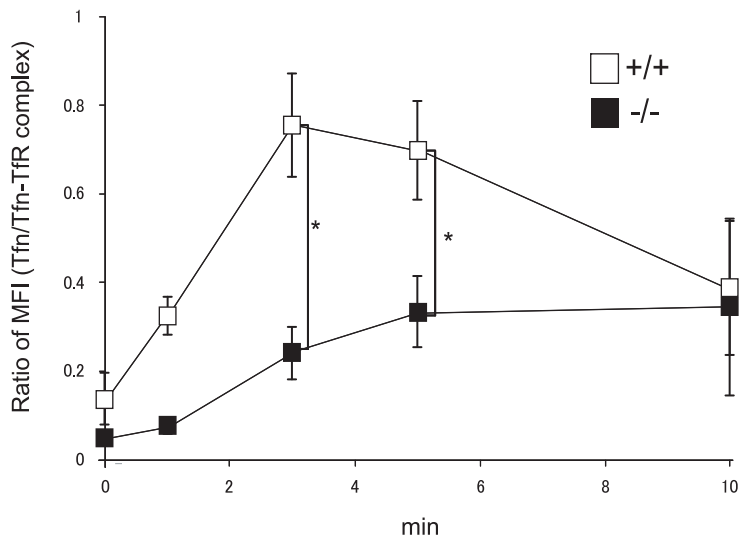

B

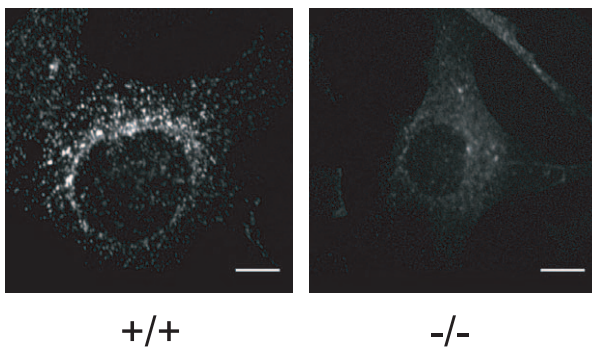

C

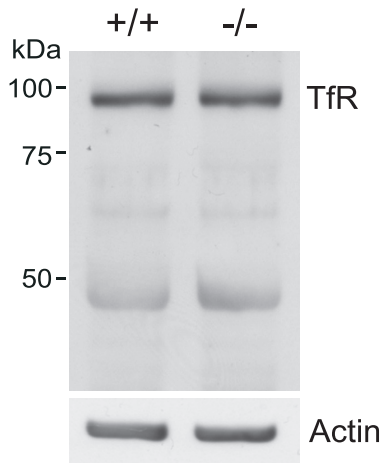

D

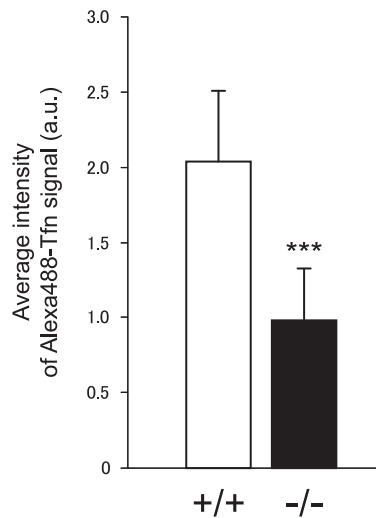

**Figure 6. Impaired transferrin internalization in *CALM*-deficient erythroid cells and MEFs.** (A) Uptake of transferrin in wild-type or *CALM*-deficient erythroid cells. Single cell suspensions from fetal livers were analyzed as described in Materials and Methods. Transferrin uptake was normalized to the ratio of mean anti-CD71 (transferrin receptor 1) fluorescence intensity between wild-type and *CALM*-deficient cells to control for

differences in transferrin receptor expression. (B) Uptake of transferrin by wild-type or *CALM*-deficient MEFs was analyzed as described previously [40]. Scale bar, 10  $\mu$ m. (C) Expression of transferrin receptor 1 in wild-type and *CALM*-deficient MEFs was analyzed by immunoblot. Actin was used as a loading control. (D) Quantification of transferrin uptake was performed as described in Materials and Methods (data represent means  $\pm$  SD; n = 50 for wild-type cells and n = 54 for *CALM*-deficient cells). \*\*\*,  $P < 0.001$  vs. control. Fluorescence is shown in arbitrary units (a.u.). In A, B, C and D, (+/+) and (-/-) represent wild-type and *CALM*-deficient MEFs, respectively.  
doi:10.1371/journal.pone.0031854.g006

incorporate transferrin. Thus, *CALM* does indeed appear to be involved in transferrin endocytosis in erythroid cells and MEFs. In addition, the LIP in erythroid cells, which represents a crossroads of iron metabolic pathways, was determined. The iron content of erythroid cells was lower in *CALM*-deficient mice compared to their wild-type littermates. Our results collectively suggest that defective transferrin endocytosis in *CALM*-deficient mice results in altered distribution of iron in the body and inhibition of erythroid maturation, resulting in an anemic state.

Discrepancies between the results obtained by RNA interference using cell lines and those derived from genetic models in mice are reported for several proteins involved in clathrin-mediated endocytosis, such as SMAP1, epsin1 and epsin 2 [36–42]. In these cases, impaired endocytosis was reported in response to the inhibition of protein expression by siRNA but not in gene-deficient mice. As suggested previously for other proteins, differences between our results and those of previous studies in terms of the involvement of *CALM* in transferrin endocytosis could be due to incomplete inhibition of protein expression using siRNA [36,37].

*CALM* was originally isolated as a component of the *CALM/AF10* fusion gene, which results from the chromosomal translocation t(10;11)(p13;q14) [16]. In a murine bone marrow transplantation model, expression of *CALM/AF10* in primary murine bone marrow cells results in the development of an aggressive form of leukemia [17,18]. These data suggest that *CALM* or clathrin-mediated endocytosis may play an important role in leukemogenesis. Recent reports demonstrate that the clathrin-binding domain of *CALM* is important for leukemogenesis by *CALM-AF10* [43,44]. The fact that deletion of *CALM* resulted in disruption of clathrin-mediated endocytosis of transferrin suggests that clathrin-mediated endocytosis may play a role in leukemogenesis. A number of other proteins that are important for hematopoiesis are substrates of clathrin-mediated endocytosis [45–47]. Thus, the *CALM*-deficient mice and MEFs established

in this study will be useful tools for elucidating the involvement of *CALM* in leukemogenesis.

*CALM* plays an important role in the central nervous system (CNS). For example, reduction of *CALM* expression in hippocampal neurons results in dendritic dystrophy [48]. Although the current study focused mainly on hematological changes in *CALM*-deficient mice, we did some preliminary analyses of the mouse brain to assess any pathology of the neural system. Although there were no differences observed in the hippocampus and dentate gyrus between wild-type and *CALM*-deficient mice, there was significant atrophy of the cortex and ventricles were markedly enlarged in *CALM*-deficient mice (data not shown). A detailed analysis of these observations will be reported elsewhere.

In summary, our analysis of *CALM*-deficient mice supports an important role for *CALM* in erythroid maturation and transferrin incorporation via clathrin-dependent endocytosis. A number of other proteins that are important for hematopoiesis are also incorporated into cells via clathrin-mediated endocytosis [45–47]; thus, *CALM*-deficient mice and MEFs established from these mice should prove to be useful for studying the involvement of *CALM* in other important hematopoietic processes. Several such experiments are currently underway in our laboratory.

## Acknowledgments

We would like to thank Dr. Issay Kitabayashi (National Cancer Center Research Institute, Tokyo, Japan) for stimulating and useful discussions, advice, and helpful comments on our results.

## Author Contributions

Conceived and designed the experiments: TW MS HT K. Tanabe. Performed the experiments: MS HT AT K. Tanabe NO SR MF K. Takei TA IM TW. Analyzed the data: TW MS HT K. Tanabe. Contributed reagents/materials/analysis tools: SK IM YK. Wrote the paper: MS TW HT YK.

## References

- Kirchhausen T (2000) Clathrin. *Annu Rev Biochem* 69: 699–727.
- Kirchhausen T, Harrison SC (1981) Protein organization in clathrin trimers. *Cell* 23: 755–761.
- Marsh M, McMahon HT (1999) The structural era of endocytosis. *Science* 285: 215–220.
- Schmid EM, McMaho HT (2007) Integrating molecular and network biology to decode endocytosis. *Nature* 448: 883–888.
- Ungewickell E, Branton D (1981) Assembly units of clathrin coats. *Nature* 289: 420–422.
- Motley A, Bright NA, Seaman MN, Robinson MS (2003) Clathrin-mediated endocytosis in AP-2-depleted cell. *J Cell Biol* 162: 909–918.
- Robinson MS (2004) Adaptable adaptors for coated vesicles. *Trends Cell Biol* 14: 167–174.
- Ahle S, Ungewickell E (1986) Purification and properties of a new clathrin assembly protein. *EMBO J* 5: 3143–3149.
- Ford MG, Pearce BM, Higgins MK, Vallis Y, Owen DJ, et al. (2001) Simultaneous binding of PtdIns(4,5)P<sub>2</sub> and clathrin by AP180 in the nucleation of clathrin lattices on membranes. *Science* 291: 1051–1055.
- Gillooly DJ, Stenmark H (2001) A lipid oils the endocytosis machine. *Science* 291: 993–994.
- Meyerholz A, Hinrichsen L, Groos S, Esk PC, Brandes G, et al. (2005) Effect of clathrin assembly lymphoid myeloid leukemia protein depletion on clathrin coat formation. *Traffic* 6: 1225–1234.
- Ford MG, Mills IG, B. Peter BJ, Vallis Y, Praefcke GJ, et al. (2002) Curvature of clathrin-coated pits driven by epsin. *Nature* 419: 361–366.
- Hom RA, Vora M, Regner M, Subach OM, Verkhusa VV, et al. (2007) pH-dependent binding of the Epsin ENTH domain and the AP180 ANTH domain to PI(4,5)P<sub>2</sub>-containing bilayers. *J Mol Biol* 373: 412–423.
- Legendre-Guillemin V, Wasiak S, Hussain NK, Angers A, McPherson PS (2004) ENTH/ANTH proteins and clathrin-mediated membrane budding. *J Cell Sci* 117: 9–18.
- Tebar F, Bohlander SK, Sorkin A (1999) Clathrin assembly lymphoid myeloid leukemia (*CALM*) protein: localization in endocytic-coated pits, interactions with clathrin, and the impact of overexpression on clathrin-mediated traffic. *Mol Biol Cell* 10: 2687–2702.
- Dreyling MH, Martinez-Climent JA, Zheng M, Mao J, Rowley JD, et al. (1996) The t(10;11)(p13;q14) in the U937 cell line results in the fusion of the AF10 gene and *CALM*, encoding a new member of the AP-3 clathrin assembly protein family. *Proc Natl Acad Sci USA* 93: 4804–4809.
- Caudell D, Aplan PD (2008) The role of *CALM-AF10* gene fusion in acute leukemia. *Leukemia* 22: 678–685.
- Deshpande AJ, Cusan M, Rawat VP, Reuter H, Krause A, et al. (2006) Acute myeloid leukemia is propagated by a leukemic stem cell with lymphoid characteristics in a mouse model of *CALM/AF10*-positive leukemia. *Cancer Cell* 10: 363–374.
- Klebig ML, Wall MD, Potter MD, Rowe EL, Carpenter DA, et al. (2003) Mutations in the clathrin-assembly gene *Picalm* are responsible for the hematopoietic and iron metabolism abnormalities in *fit1* mice. *Proc Natl Acad Sci USA* 100: 8360–8365.

20. Potter MD, Klebig ML, Carpenter DA, Rinchik EM (1995) Genetic and physical mapping of the fitness 1 (fit1) locus within the Fes-Hbb region of mouse chromosome 7. *Mamm Genome* 6: 70–75.
21. Potter MD, Shipcock SG, Popp RA, Godfrey V, carpenter DA, et al. (1997) Mutations in the murine fitness 1 gene result in defective hematopoiesis. *Blood* 90: 1850–1857.
22. Schultze AE, McEntee MF, Daniel GB, Jonson DK (1999) Radiographic, histologic, and cytologic lesions associated with mutations in the fitness 1(4226SB) locus of mice. *Lab Anim Sci* 49: 260–268.
23. Schultze AE, Schaeffer DO, Potter MD, Jonson DK (1997) Alterations in growth, haematopoiesis and serum chemistry profiles in fitness 1(4226SB) mutant mice. *Comp Haematol Int* 7: 143–151.
24. Yagi T, Tokunaga T, Furuta Y, Nada S, Yoshida M, et al. (1993) A novel ES cell line, T12, with high germline-differentiating potency. *Anal Biochem* 214: 70–76.
25. Tanabe K, Takei K (2009) Dynamic instability of microtubules requires dynamin 2 and is impaired in a Charcot-Marie-Tooth mutant. *J Cell Biol* 185: 939–948.
26. Prus E, Fibach E (2008) The labile iron pool in human erythroid cells. *Br J Haematol* 142: 301–307.
27. Epsztejn S, Kakhlon O, Glickstein H, Breuer W, Cabantchik I (1997) Fluorescence analysis of the labile iron pool of mammalian cells. *Anal Biochem* 248: 31–40.
28. Socolovsky M, Nam H, Fleming MD, Haase VH, Brugnara C, et al. (2001) Ineffective erythropoiesis in Stat5a(-/-)5b(-/-) mice due to decreased survival of early erythroblasts. *Blood* 98: 3261–3273.
29. Chen K, Liu J, Heck S, Chasis JA, An X, et al. (2009) Resolving the distinct stages in erythroid differentiation based on dynamic changes in membrane protein expression during erythropoiesis. *Proc Natl Acad Sci USA* 106: 17413–17418.
30. Gunshin H, Fujiwara Y, Custodio AO, Drenzo C, Robine S, et al. (2005) Slc11a2 is required for intestinal iron absorption and erythropoiesis but dispensable in placenta and liver. *J Clin Invest* 115: 1258–1266.
31. Levy JE, Jin O, Fujiwara Y, Kuo F, Andrews NC (1999) Transferrin receptor is necessary for development of erythrocytes and the nervous system. *Nat Genet* 21: 396–399.
32. Karázi E, Jakab K, Homolya L, Szakács G, Holló Z, et al. (2001) Calcein assay for multidrug resistance reliably predicts therapy response and survival rate in acute myeloid leukaemia. *Br J Haematol* 112: 308–314.
33. Hentze MW, Muckenthaler MU, Andrews NC (2004) Balancing acts: molecular control of mammalian iron metabolism. *Cell* 117: 285–297.
34. Richardson DR, Ponka P (1997) The molecular mechanisms of the metabolism and transport of iron in normal and neoplastic cells. *Biochim Biophys Acta* 1331: 1–40.
35. Hinrichsen L, Harborth J, Andrees L, Weber K, Ungewickell EJ (2003) Effect of clathrin heavy chain- and alpha-adaptin-specific small inhibitory RNAs on endocytic accessory proteins and receptor trafficking in HeLa cells. *J Biol Chem* 278: 45160–45170.
36. Harel A, Wu F, Mattson MP, Morris CM, Yao PJ (2008) Evidence for CALM in directing VAMP2 trafficking. *Traffic* 9: 417–429.
37. Huang F, Khvorova A, Marshall W, Sorkin A (2004) Analysis of clathrin-mediated endocytosis of epidermal growth factor receptor by RNA interference. *J Biol Chem* 279: 16657–16661.
38. Chen H, Ko G, Zatti A, Di Giacomo G, Liu L, et al. (2009) Embryonic arrest at midgestation and disruption of Notch signaling produced by the absence of both epsin 1 and epsin 2 in mice. *Proc Natl Acad Sci USA* 106: 13838–13843.
39. Kazacic M, Bertelsen W, Pedersen KW, Vuong TT, Grandal MV, et al. (2009) Epsin 1 is involved in recruitment of ubiquitinated EGF receptors into clathrin-coated pits. *Traffic* 10: 235–245.
40. Kon S, Tanabe K, Watanabe T, Sabe H, Satake M (2008) Clathrin dependent endocytosis of E-cadherin is regulated by the Arf6GAP isoform SMAP1. *Exp Cell Res* 314: 1415–1428.
41. Tanabe K, Torii T, Natsume W, Braesch-Andersen S, Watanabe T, et al. (2005) A novel GTPase-activating protein for ARF6 directly interacts with clathrin and regulates clathrin-dependent endocytosis. *Mol Biol Cell* 16: 1617–1628.
42. Vanden Broeck D, De Wolf MJ (2006) Selective blocking of clathrin-mediated endocytosis by RNA interference: epsin as target protein. *Biotechniques* 41: 475–484.
43. Deshpande AJ, Rouhi A, Lin Y, Stadler C, Greif PA, et al. (2011) The clathrin-binding domain of CALM and the OM-LZ domain of AF10 are sufficient to induce acute myeloid leukemia in mice. *Leukemia* 25: 1718–1727.
44. Stoddart A, Tennant TR, Fernald AA, Anastasi J, Brodsky FM, et al. (2011) The clathrin-binding domain of CALM-AF10 alters the phenotype of myeloid neoplasms in mice. *Oncogene* (27 June 2011) | doi:10.1038/onc.2011.251.
45. D Henriques CM, Rino J, Nibbs RJ, Graham GJ, Barata JT (2010) IL-7 induces rapid clathrin-mediated internalization and JAK3-dependent degradation of IL-7R alpha in T cells. *Blood* 115: 3269–3277.
46. Lei JT, Martinez-Moczygemba M (2008) Separate endocytic pathways regulate IL-5 receptor internalization and signaling. *J Leukoc Biol* 84: 499–509.
47. Sulahian R, Cleaver O, Huang LJ (2009) Ligand-induced EpoR internalization is mediated by JAK2 and p85 and is impaired by mutations responsible for primary familial and congenital polycythemia. *Blood* 113: 5287–5297.
48. Bushlin I, Petralia RS, Wu F, Harel A, Mughal MR, et al. (2008) Clathrin assembly protein AP180 and CALM differentially control axogenesis and dendrite outgrowth in embryonic hippocampal neurons. *Journal of Neuroscience* 28: 10257–10271.
